# Supplementary material for: Long-Term Glucocorticoid Use and Cancer Risk: A Population-Based Cohort Study in South Korea
Source: Oxford University Press journal article supplement (doi:10.1158/1940-6207.capr-20-0161), 2020-08-24
Supplement: 19406207capr200161-sup-240771_4_supp_6478601_qbmbb1.docx [file 19406207capr200161-sup-240771_4_supp_6478601_qbmbb1.docx]

Supplementary Table 2. ICD-10 codes for autoimmune disease

Sarcoidosis: D86.9

Gout, Unspecified: M10.9

Other disorders of calcium metabolism: E83.59

Autoimmune disease, not elsewhere classified: D89.89

Drug-induced autoimmune anemia: D59.0

Other autoimmune hemolytic anemias: D59.1

Raynaud's syndrome: I73.00

Raynaud’s syndrome with gangrene: I73.01

Other and unspecified capillary diseases: I78.9

Dyskinesia of esophagus: K22.4

Regional enteritis of unspecified site: K50.90

Autoimmune hepatitis: K75.4

Primary biliary cirrhosis: K74.3

Secondary biliary cirrhosis: K74.4

Biliary cirrhosis, unspecified: K74.5

Cholangitis: K83.0

Celiac Disease: K90.0

Arthropathic psoriasis, unspecified: L40.50

Psoriatic juvenile arthropathy: L40.54

Other psoriatic arthropathy: L40.59

Psoriasis vulgaris: L40.0

Generalized pustular psoriasis: L40.1

Acrodermatitis continua: L40.2

Other psoriasis: L40.8

Systemic lupus erythematosus: M32.10

Progressive systemic sclerosis: M34.0

CR(E)ST syndrome: M34.1

Systemic sclerosis induced by drug and chemical: M34.2

Systemic sclerosis with lung involvement: M34.81

Systemic sclerosis with myopathy: M34.82

Systemic sclerosis with polyneuropathy: M34.83

Other systemic sclerosis: M34.89

Systemic sclerosis, unspecified: M34.9

Sicca syndrome, unspecified: M35.00

Sicca syndrome with keratoconjunctivitis: M35.01

Sicca syndrome with lung involvement: M35.02

Sicca syndrome with myopathy: M35.03

Sicca syndrome with tubulo-interstitial nephropathy: M35.04

Sicca syndrome with other organ involvement: M35.09

Dermatomyositis: M33.90

Unspecified diffuse connective tissue disease: M35.9

Unspecified infective arthritis, site unspecified: M00.9

Unspecified crystal arthropathies, multiple sites: M11.9

Rheumatoid arthritis: M06.9

Polyarticular juvenile rheumatoid arthritis, chronic or unspecified: M08.00

Osteoarthrosis, generalized, multiple sites: M15.0

Osteoarthrosis, localized, primary, shoulder region M19.019

Osteoarthrosis, localized, primary, upper arm M19.029

Osteoarthrosis, localized, primary, forearm M19.039

Osteoarthrosis, localized, primary, hand: M19.049

Bilateral primary osteoarthritis of hip: M16.0

Unilateral primary osteoarthritis, unspecified hip: M16.10

Unilateral primary osteoarthritis, right hip: M16.11

Unilateral primary osteoarthritis, left hip: M16.12

Osteoarthrosis, localized, primary, ankle and foot: M19.079

Osteoarthrosis, localized, primary, other specified sites: M19.91

Osteoarthrosis, unspecified whether generalized or localized, lower leg: M17.9

Pain in joint, upper arm: M25.529

Pain in unspecified hand: M79.643

Pain in unspecified finger(s): M79.646

Pain in joint, pelvic region and thighs: M25.559

Pain in joint, ankle and foot: M25.579

Pain in joint, multiple sites: M25.50

Ankylosing spondylitis: M45.9

Spondylosis of unspecified site, without mention of myelopathy: M47.819

Polymyalgia rheumatica: M35.3

Myositis, unspecified: M60.9

Myalgia: M79.1

Pain in limb: M79.609

Raised antibody titer: R76.0

Nonspecific reaction to tuberculin skin test without active tuberculosis: R76.11

Nonspecific reaction to cell mediated immunity measurement of gamma interferon antigen response without active tuberculosis: R76.12

Other specified abnormal immunological findings in serum: R76.8

Abnormal immunological findings in serum, unspecified: R76.9
