# Supplementary material for: Long-Term Glucocorticoid Use and Cancer Risk: A Population-Based Cohort Study in South Korea
Source: Oxford University Press journal article supplement (doi:10.1158/1940-6207.capr-20-0161), 2020-08-24
Supplement: 19406207capr200161-sup-240771_4_supp_6478603_qlmll2.docx [file 19406207capr200161-sup-240771_4_supp_6478603_qlmll2.docx]

Supplementary Table 4. Subgroup analyses

| Variable | | Multivariable model | *P-value* |
| --- | --- | --- | --- |
| Hazard ratio (95% CI) |
| Risk of liver cancer in patients with liver disease (n=120,334) | |  |  |
|  | Unexposed individuals | 1 |  |
|  | Long-term GC users | 1.39 (0.86, 2.24) | 0.177 |
| Risk of lung cancer in patients with COPD (n=8,399) | |  |  |
|  | Unexposed individuals | 1 |  |
|  | Long-term GC users | 1.73 (0.92, 3.26) | 0.091 |
| Risk of lung cancer in patients with asthma (n=87,577) | |  |  |
|  | Unexposed individuals | 1 |  |
|  | Long-term GC users | 2.13 (1.32, 3.46) | 0.002 |

CI, confidence interval; GC, glucocorticoid; COPD, chronic obstructive pulmonary disease
