# Supplementary material for: Long-Term Glucocorticoid Use and Cancer Risk: A Population-Based Cohort Study in South Korea
Source: Oxford University Press journal article supplement (doi:10.1158/1940-6207.capr-20-0161), 2020-08-24
Supplement: 19406207capr200161-sup-240771_4_supp_6478604_q5m552.docx [file 19406207capr200161-sup-240771_4_supp_6478604_q5m552.docx]

Supplementary Table S5. Comparison of BMI, Smoking status, alcohol consumption between chronic GC users and control group after PS matching among 2010 NHIS cohort who received health examination.

| **Variable** | | Chronic GC user | Control group | *P*-value |
| --- | --- | --- | --- | --- |
| BMI , Kg/M2 | | (n=357) | (n=1,938) | 0.009 |
|  | < 18.5 | 24 (6.7) | 83 (4.3) |  |
|  | 18.5-24.9 | 267 (74.8) | 1,488 (76.8) |  |
|  | 25.0-29.9 | 57 (16.0) | 256 (13.2) |  |
|  | ≥ 30.0 | 9 (2.5) | 111 (5.7) |  |
| Alcohol consumption per week | | (n=441) | (n=2,436) | <0.001 |
|  | 0 | 324 (73.5) | 1,535 (63.0) |  |
|  | 1-3 day | 94 (21.3) | 766 (31.4) |  |
|  | 4-7 day | 23 (5.2) | 135 (5.5) |  |
| Smoking status | | (n=441) | (n=2,440) | 0.626 |
|  | Never smoker | 291 (66.0) | 1,667 (68.3) |  |
|  | Ex-smoker | 66 (15.0) | 338 (13.9) |  |
|  | Current smoker | 84 (19.0) | 435 (17.8) |  |

Presented as number with percentage

GC, glucocorticoid; BMI, body mass index; PS, propensity score matching; NHIS, national health insurance service
